# Supplementary material
Source: ML conference proceedings conference paper supplement (https://proceedings.neurips.cc/paper_files/paper/2012/hash/7eabe3a1649ffa2b3ff8c02ebfd5659f-Abstract.html)
Supplement: Supplementary file 1 [file 7eabe3a1649ffa2b3ff8c02ebfd5659f-Supplemental.zip]

Archive with 3 entries (2 files):
- supplemental_NIPS.pdf
- __MACOSX/
- __MACOSX/._supplemental_NIPS.pdf
